# Supplementary material
Source: MDPI journal article supplement (https://www.mdpi.com/2311-5637/8/1/32)
Supplement: s1 [file s1]

Recipe Name:

Category:

**Table S1.** Sensory Evaluation Form. **Directions:** Check one rating for each of the following:  
Appearance, Taste/Flavour, Texture, Aroma/Smell, and Overall Acceptability.

| Rating Scale                | Appearance | Taste/Flavour | Texture | Aroma/Smell | Crumbs | Overall Acceptability |
|-----------------------------|------------|---------------|---------|-------------|--------|-----------------------|
| 9. Like Extremely           |            |               |         |             |        |                       |
| 8. Like Very Much           |            |               |         |             |        |                       |
| 7. Like Moderately          |            |               |         |             |        |                       |
| 6. Like slightly            |            |               |         |             |        |                       |
| 5. Neither Like nor Dislike |            |               |         |             |        |                       |
| 4. Dislike Slightly         |            |               |         |             |        |                       |
| 3. Dislike Moderately       |            |               |         |             |        |                       |
| 2. Dislike Very Much        |            |               |         |             |        |                       |
| 1. Dislike Extremely        |            |               |         |             |        |                       |
| Official Use Only           |            |               |         |             |        |                       |
| Panelist                    | Code:      | Date:         |         |             |        |                       |
| Total Score:                |            | Mean Score:   |         |             |        |                       |
